# Supplementary material for: Crystal-to-crystal polymerisation of monosubstituted [PW11O39Cu(H2O)]5− Keggin-type anions
Source: Royal Society of Chemistry journal article supplement (doi:10.1039/d4dt00690a), 2024-01-01
Supplement: d4dt00690a1.pdf [file d4dt00690a1.pdf]

## Electronic Supplementary Information

### Crystal-to-Crystal Polymerisation of Monosubstituted [PW<sub>11</sub>O<sub>39</sub>Cu(H<sub>2</sub>O)]<sup>5-</sup> Keggin-Type Anions

Estibaliz Ruiz-Bilbao,<sup>a,b</sup> Aroa Pache,<sup>a</sup> Unai Barrenechea,<sup>a</sup> Santiago Reinoso,<sup>c</sup> Leire San Felices,<sup>d</sup> Maria dM. Vivanco,<sup>e</sup> Luis Lezama,<sup>a</sup> Beñat Artetxe,<sup>\*a</sup> and Juan M. Gutiérrez-Zorrilla<sup>\*a,b</sup>

---

[a] Departamento de Química Orgánica e Inorgánica, Facultad de Ciencia y Tecnología, Universidad del País Vasco UPV/EHU, P.O. Box 644, 48080 Bilbao, Spain.

[b] BCMaterials Edificio Martina Casiano, 3<sup>rd</sup> Floor, UPV/EHU Science Park, Barrio Sarriena s/n, 48940 Leioa, Spain.

[c] Institute for Advanced Materials and Mathematics (INAMAT2), Departamento de Ciencias, Universidad Pública de Navarra (UPNA), Campus de Arrosadía, 31006 Pamplona, Spain.

[d] Servicios Generales de Investigación SGIker, Facultad de Ciencia y Tecnología, Universidad del País Vasco UPV/EHU P.O. Box 644, 48080 Bilbao, Spain.

[e] Cancer Heterogeneity Lab, Center for Cooperative Research in Biosciences (CIC bioGUNE), Basque Research and Technology Alliance (BRTA), Bizkaia Technology Park, 48160 Derio, Spain.

## TABLE OF CONTENTS .....

### FIGURES

|                                                                                                                                                                                                                                                                                                                                                                                                                                                                                       |    |
|---------------------------------------------------------------------------------------------------------------------------------------------------------------------------------------------------------------------------------------------------------------------------------------------------------------------------------------------------------------------------------------------------------------------------------------------------------------------------------------|----|
| <b>Figure S1.</b> FTIR spectrum of <b>1</b> (blue) compared to that of the $K_7[\alpha\text{-PW}_{11}\text{O}_{39}]\cdot 14\text{H}_2\text{O}$ precursor.....                                                                                                                                                                                                                                                                                                                         | 4  |
| <b>Figure S2.</b> PXRD diffraction patterns for the syntheses carried out for different POM: $\text{Cu}^{2+}$ :pic ratios. ....                                                                                                                                                                                                                                                                                                                                                       | 4  |
| <b>Figure S3.</b> TGA curve for <b>1</b> . ....                                                                                                                                                                                                                                                                                                                                                                                                                                       | 5  |
| <b>Figure S4.</b> Comparison of the PXRD patterns collected for <b>1</b> at room temperature and 250 °C with those calculated from SCXRD data for <b>1</b> and <b>2a</b> , respectively.....                                                                                                                                                                                                                                                                                          | 5  |
| <b>Figure S5.</b> Identification of the final residue from the thermal decomposition of <b>1</b> by PXRD analyses. Blue lines correspond to diffraction maxima from monoclinic <i>Pmnb</i> $\text{WO}_3$ (PDF: 01-071-0131) and green lines to monoclinic <i>C2/c</i> $\text{CuO}$ (PDF: 00-002-1041).....                                                                                                                                                                            | 6  |
| <b>Figure S6.</b> ORTEP representation of <b>1</b> and <b>2a</b> showing 50% probability ellipsoids and atom labelling scheme. Colour code: Mo, grey; P, dark red; Cu, blue; O, red; N, green; C, black; H, light grey. The disordered $\text{Cu}^{\text{II}}$ atom in the Keggin anion has been omitted for <b>1</b> , but has been depicted on the addenda metal positions 7 and 9 for <b>2a</b> . Symmetry codes: i) $-x, -y, 1-z$ ; ii) $1-x, \frac{1}{2}+y, \frac{1}{2}-z$ ..... | 6  |
| <b>Figure S7.</b> View of the crystal packing of <b>1</b> along the crystallographic <i>y</i> axis. ....                                                                                                                                                                                                                                                                                                                                                                              | 7  |
| <b>Figure S8.</b> Polyhedral representation of $\{\text{PW}_{11}\text{O}_{39}\text{Cu}\}_n$ chains in <b>2a</b> .....                                                                                                                                                                                                                                                                                                                                                                 | 7  |
| <b>Figure S9.</b> TGA curve for the dehydration of <b>1</b> (blue) compared to those of samples of <b>2a</b> left to hydrate in open air for 1 (pink) or 3 days (grey), as well as that of <b>2h</b> dehydrated at 170 °C and exposed to ambient moisture for 1 day (orange). ....                                                                                                                                                                                                    | 8  |
| <b>Figure S11.</b> Structural comparison of the polymeric entities in <b>2a</b> (left) and <b>2h</b> (right). Hydrogen-bonding interactions involving water molecules are depicted as red lines.....                                                                                                                                                                                                                                                                                  | 9  |
| <b>Figure S12.</b> X-band EPR spectra at room temperature and 4K for <b>1</b> (left) and <b>2a</b> (right). ....                                                                                                                                                                                                                                                                                                                                                                      | 9  |
| <b>Figure S13.</b> Evolution of the X-band EPR single-crystal spectra of <b>1</b> for the three perpendicular <i>xy</i> , <i>xz</i> and <i>yz</i> planes. The spectra were recorded for different angles every 10°. ....                                                                                                                                                                                                                                                              | 9  |
| <b>Figure S14.</b> Angular variation of the linewidth in X-band EPR single-crystal spectra of <b>1</b> for the <i>xy</i> , <i>xz</i> and <i>yz</i> planes.....                                                                                                                                                                                                                                                                                                                        | 10 |

### EQUATIONS

|                                                                                                                                                                                                                                        |    |
|----------------------------------------------------------------------------------------------------------------------------------------------------------------------------------------------------------------------------------------|----|
| <b>Equation 1.</b> Set of equations employed to fit the angular variation of the EPR signal in three mutually perpendicular planes. The principal <i>g</i> values were calculated by diagonalization of the obtained $g^2$ tensor..... | 10 |
|----------------------------------------------------------------------------------------------------------------------------------------------------------------------------------------------------------------------------------------|----|

## TABLES

|                                                                                                                                                                                                                                   |    |
|-----------------------------------------------------------------------------------------------------------------------------------------------------------------------------------------------------------------------------------|----|
| <b>Table S1.</b> Copper population factors for the addenda metal positions within the inorganic $[\text{PW}_{11}\text{O}_{39}\text{Cu}(\text{H}_2\text{O})]^{5-}$ building-block in <b>1</b> , <b>2a</b> and <b>2h</b> . .....    | 11 |
| <b>Table S2.</b> Cu–O and Cu–N bond lengths (Å) and O–Cu–N and O–Cu–O angles (°) in the metalorganic units of <b>1</b> , <b>2a</b> and <b>2h</b> .....                                                                            | 11 |
| <b>Table S3.</b> Geometrical parameters of the intermolecular N–H···O and C–H···O hydrogen bonds in <b>1</b> , <b>2a</b> and <b>2h</b> .....                                                                                      | 11 |
| <b>Table S3 (continuation).</b> Geometrical parameters of the intermolecular N–H···O and C–H···O type hydrogen bonds in <b>1</b> , <b>2a</b> and <b>2h</b> .....                                                                  | 11 |
| <b>Table S4</b> Distances (Å) from the O atoms of W1-W2-W3 trimers to picolinate ring centroids in <b>2a</b> and <b>2h</b> ( $C_{g_{\text{pic}}} = \text{N1A}, \text{C2A}, \text{C3A}, \text{C4A}, \text{C5A}, \text{C6A}$ )..... | 12 |
| <b>Table S5.</b> Distances (Å) from the O atoms of W1-W2-W3 trimers to picolinate ring planes (N1A, C2A, C3A, C4A, C5A, C6A) in <b>2a</b> and <b>2h</b> .....                                                                     | 13 |

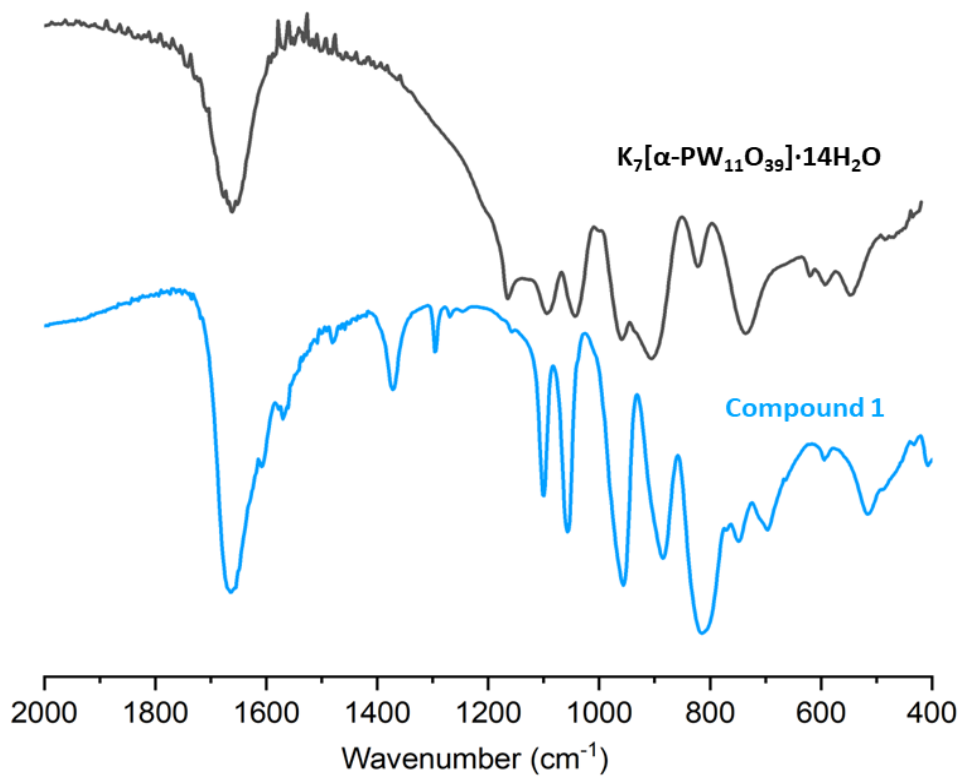

**Figure S1.** FTIR spectrum of **1** (blue) compared to that of the  $\text{K}_7[\alpha\text{-PW}_{11}\text{O}_{39}] \cdot 14\text{H}_2\text{O}$  precursor.

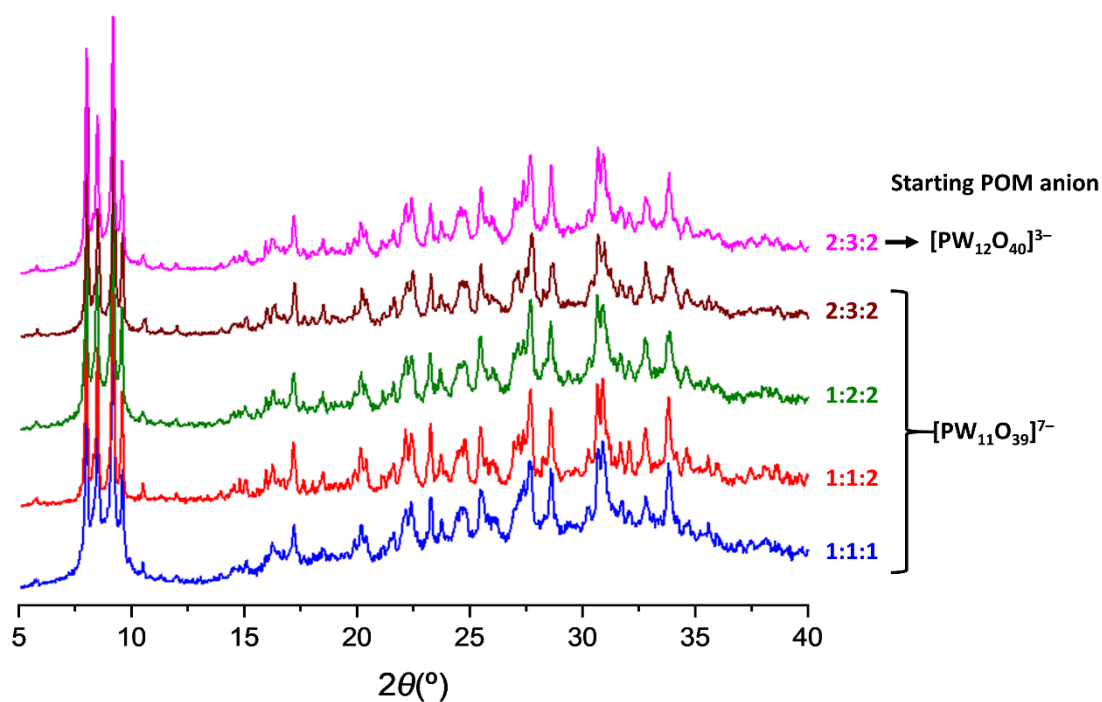

**Figure S2.** PXRD diffraction patterns for the syntheses carried out for different POM: $\text{Cu}^{2+}$ :pic ratios.

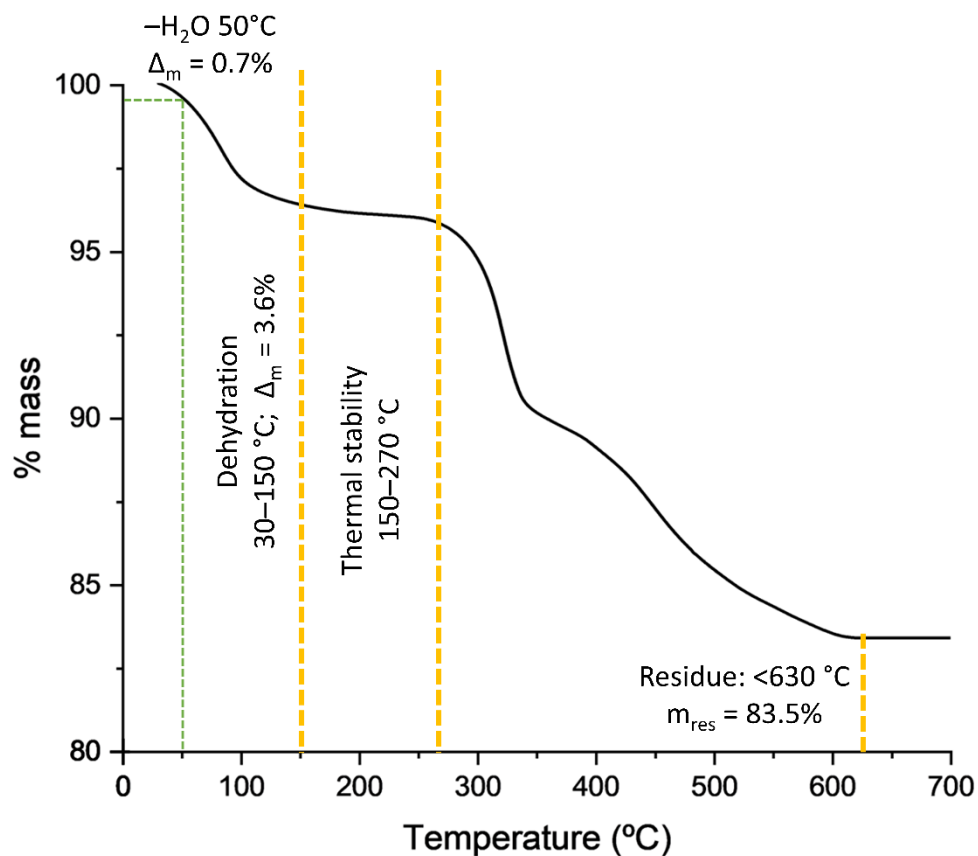

**Figure S3.** TGA curve for **1**.

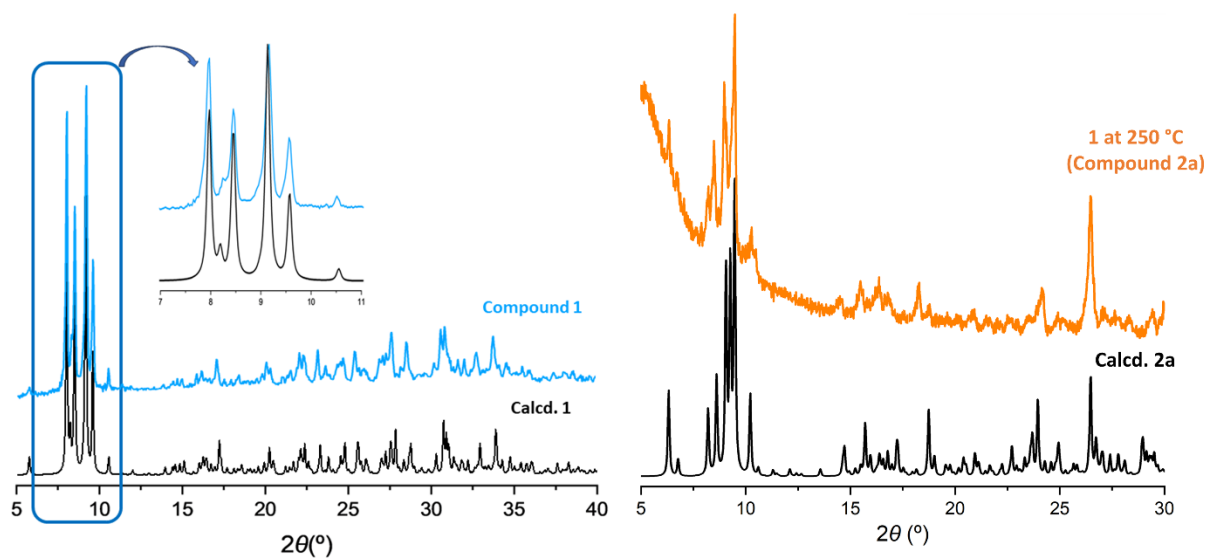

**Figure S4.** Comparison of the PXRD patterns collected for **1** at room temperature and 250 °C with those calculated from SCXRD data for **1** and **2a**, respectively.

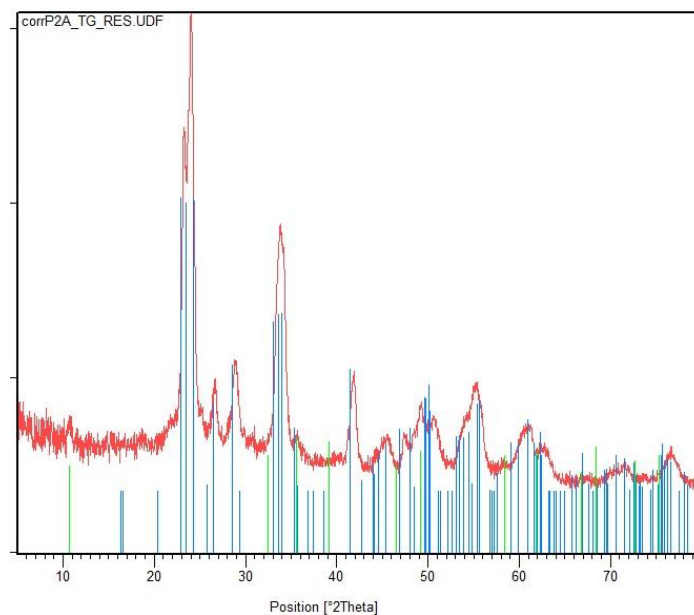

**Figure S5.** Identification of the final residue from the thermal decomposition of **1** by PXRD analyses. Blue lines correspond to diffraction maxima from monoclinic *Pmb* WO<sub>3</sub> (PDF: 01-071-0131) and green lines to monoclinic *C2/c* CuO (PDF: 00-002-1041).

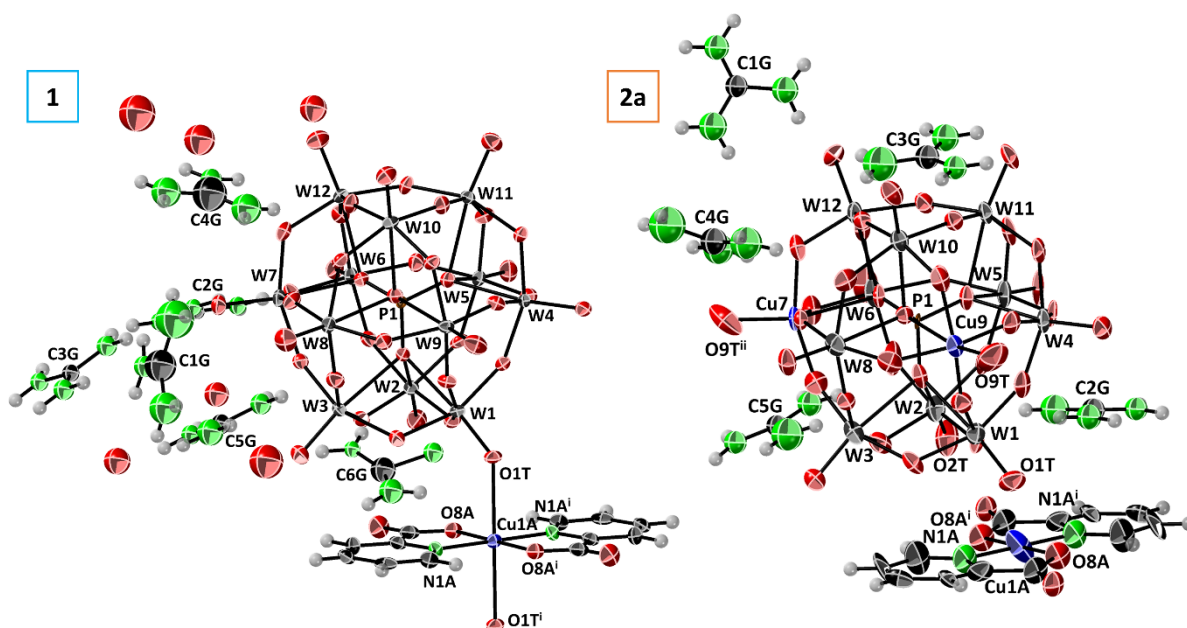

**Figure S6.** ORTEP representation of **1** and **2a** showing 50% probability ellipsoids and atom labelling scheme. Colour code: Mo, grey; P, dark red; Cu, blue; O, red; N, green; C, black; H, light grey. The disordered Cu<sup>II</sup> atom in the Keggin anion has been omitted for **1**, but has been depicted on the addenda metal positions 7 and 9 for **2a**. Symmetry codes: i)  $-x, -y, 1-z$ ; ii)  $1-x, \frac{1}{2}+y, \frac{1}{2}-z$ .

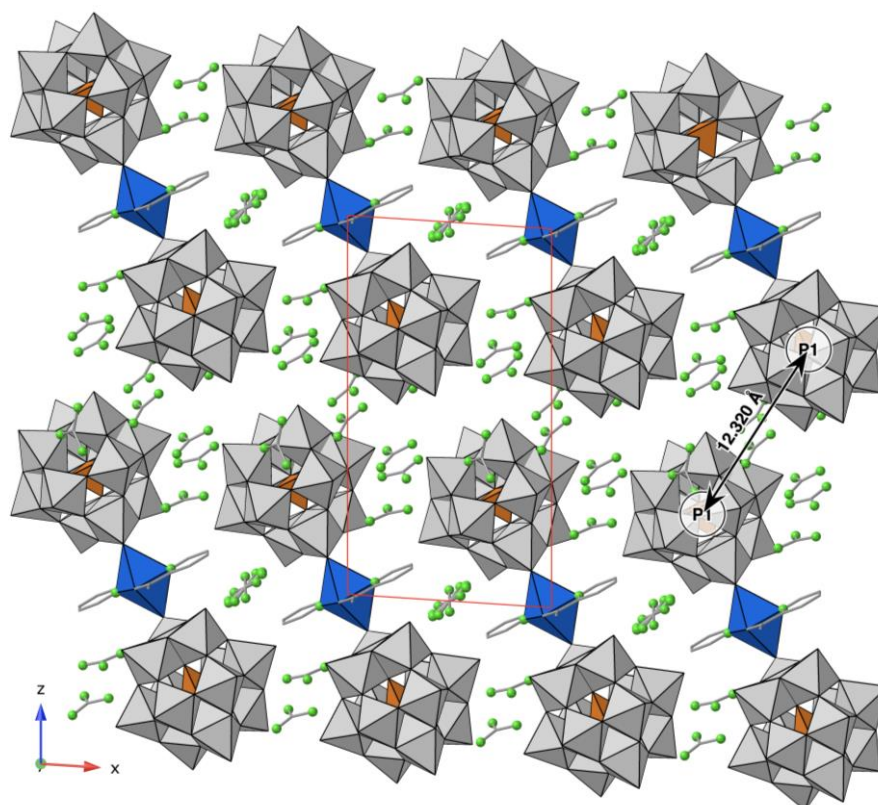

**Figure S7.** View of the crystal packing of **1** along the crystallographic y axis.

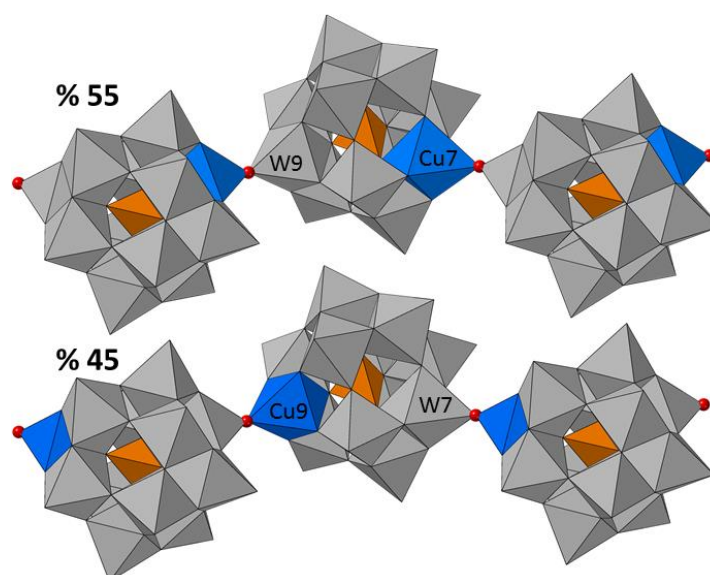

**Figure S8.** Polyhedral representation of  $\{PW_{11}O_{39}Cu\}_n$  chains in **2a**.

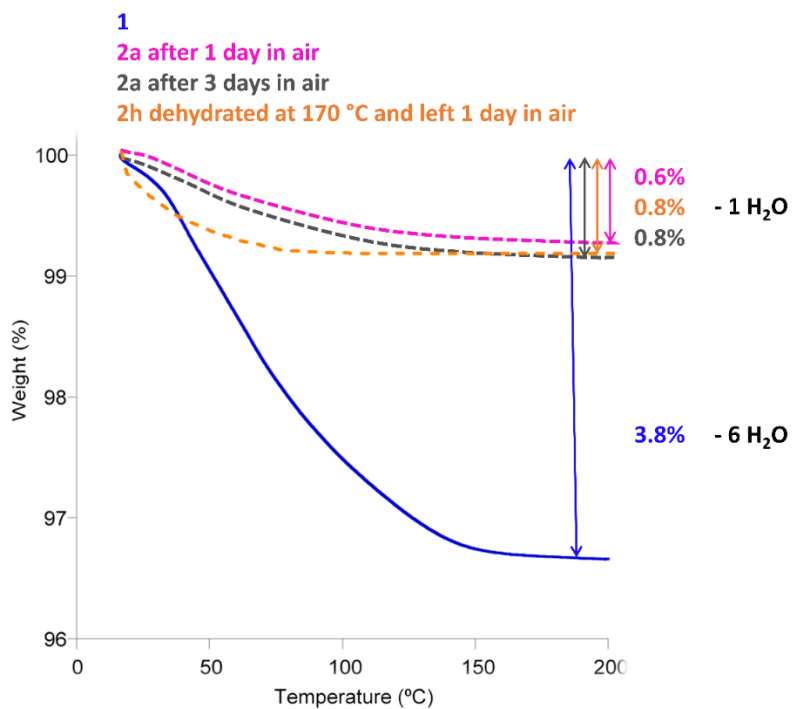

**Figure S9.** TGA curve for the dehydration of **1** (blue) compared to those of samples of **2a** left to hydrate in open air for 1 (pink) or 3 days (grey), as well as that of **2h** dehydrated at 170 °C and exposed to ambient moisture for 1 day (orange).

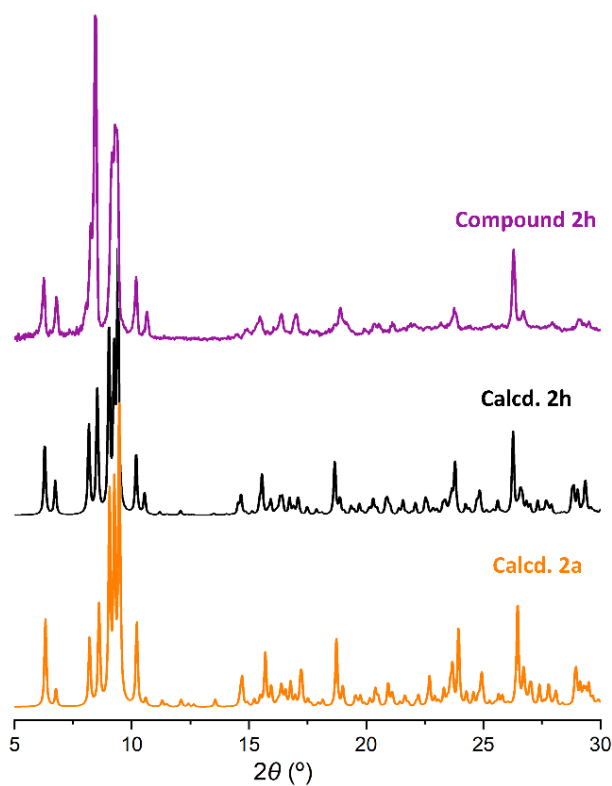

**Figure S10.** Experimental PXRD pattern of **2h** prepared by exposing crystals of **2a** to room atmosphere for one day compared to those calculated from scXRD data for **2a** and **2h**.



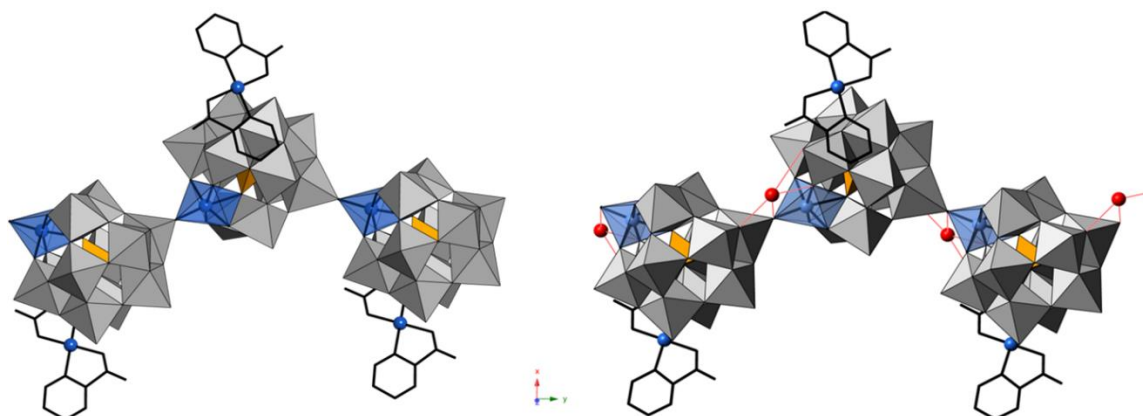

**Figure S11.** Structural comparison of the polymeric entities in **2a** (left) and **2h** (right). Hydrogen-bonding interactions involving water molecules are depicted as red lines.

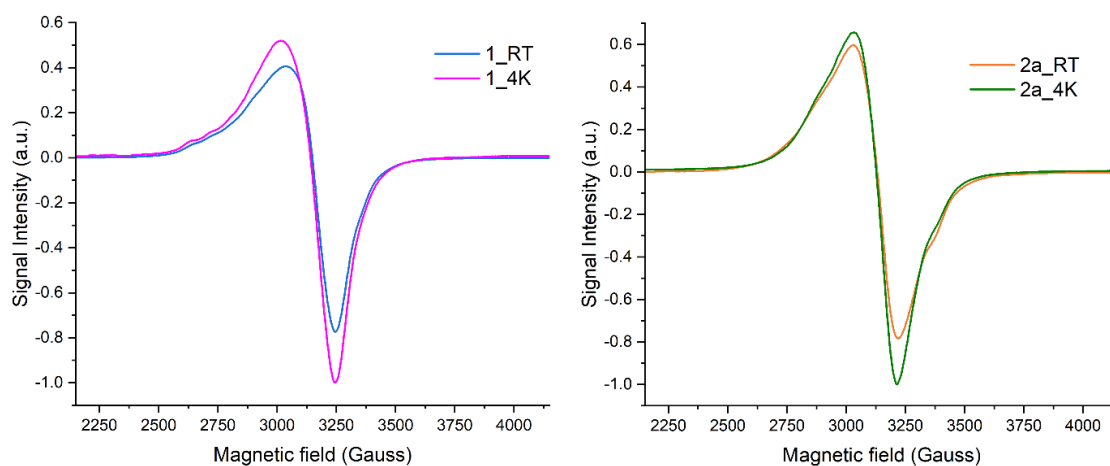

**Figure S12.** X-band EPR spectra at room temperature and 4K for **1** (left) and **2a** (right).

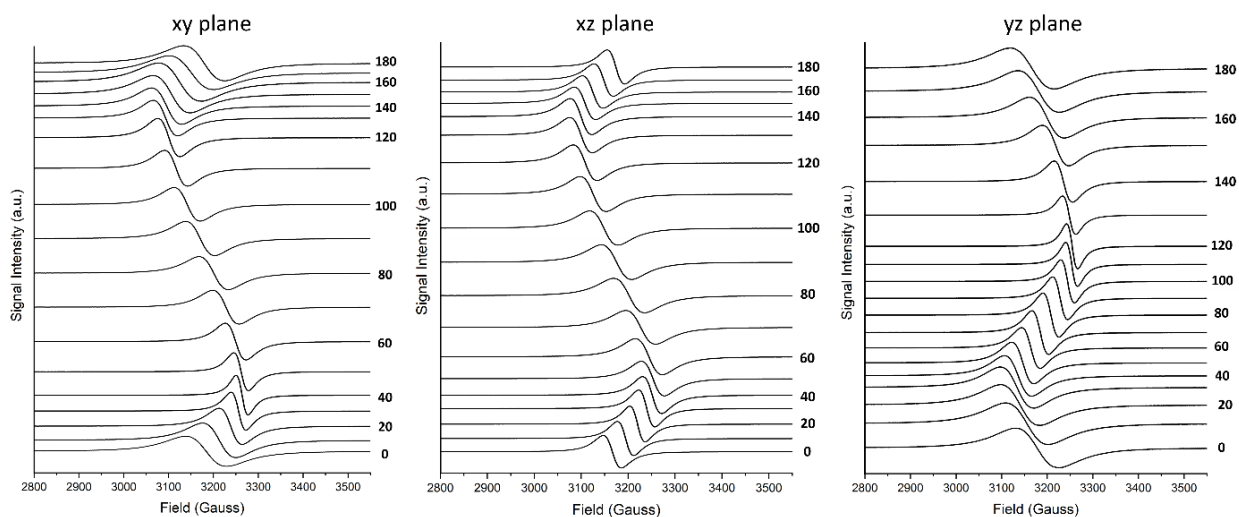

**Figure S13.** Evolution of the X-band EPR single-crystal spectra of **1** for the three perpendicular xy, xz and yz planes. The spectra were recorded for different angles every 10°.

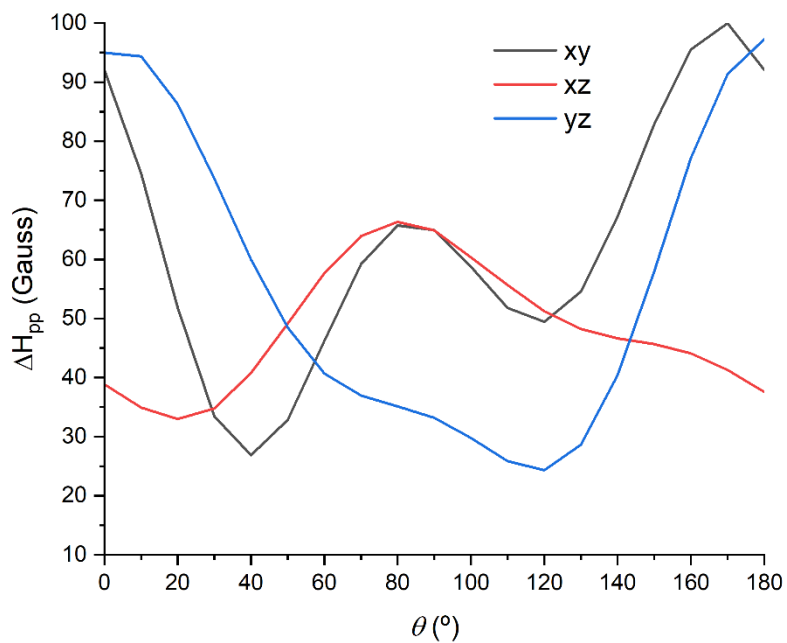

**Figure S14.** Angular variation of the linewidth in X-band EPR single-crystal spectra of **1** for the xy, xz and yz planes.

**Equation 1.** Set of equations employed to fit the angular variation of the EPR signal in three mutually perpendicular planes. The principal g values were calculated by diagonalization of the obtained  $g^2$  tensor.

$$g^2_{(xy)} = g_{xx}^2 \cos^2(\theta) + 2 g_{xy} \cos(\theta) \sin(\theta) + g_{yy}^2 \sin^2(\theta)$$

$$g^2_{(xz)} = g_{xx}^2 \cos^2(\theta) + 2 g_{xz} \cos(\theta) \sin(\theta) + g_{zz}^2 \sin^2(\theta)$$

$$g^2_{(yz)} = g_{yy}^2 \cos^2(\theta) + 2 g_{yz} \cos(\theta) \sin(\theta) + g_{zz}^2 \sin^2(\theta)$$

**Table S1.** Copper population factors for the addenda metal positions within the inorganic  $[PW_{11}O_{39}Cu(H_2O)]^{5-}$  building-block in **1**, **2a** and **2h**.

|           | W1 | W2  | W3  | W4  | W5  | W6  | W7   | W8   | W9   | W10 | W11 | W12 |
|-----------|----|-----|-----|-----|-----|-----|------|------|------|-----|-----|-----|
| <b>1</b>  | –  | 4.8 | 7.9 | 9.0 | 7.9 | 3.2 | 10.6 | 18.6 | 18.5 | 4.2 | 6.9 | 8.4 |
| <b>2a</b> | –  | –   | –   | –   | –   | –   | 44.9 | –    | 55.1 | –   | –   | –   |
| <b>2h</b> | –  | –   | –   | –   | –   | –   | 45.0 | –    | 55.0 | –   | –   | –   |

**Table S2.** Cu–O and Cu–N bond lengths (Å) and O–Cu–N and O–Cu–O angles (°) in the metalorganic units of **1**, **2a** and **2h**.

| <b>1</b>              |          | <b>2a</b>               |         | <b>2h</b>             |         |
|-----------------------|----------|-------------------------|---------|-----------------------|---------|
| Cu1A–O1T              | 2.507(5) | Cu1A···O2T              | 3.79(3) | Cu1A–O2T              | 3.99(3) |
| Cu1A–O1T <sup>i</sup> | 2.507(5) | Cu1A···O2T <sup>i</sup> | 3.79(3) | Cu1A–O2T <sup>i</sup> | 3.99(3) |
| Cu1A–O8A              | 1.945(5) | Cu1A–O8A                | 1.91(2) | Cu1A–O8A              | 1.89(3) |
| Cu1A–O8A <sup>i</sup> | 1.945(5) | Cu1A–O8A <sup>i</sup>   | 1.91(2) | Cu1A–O8A <sup>i</sup> | 1.89(3) |
| Cu1A–N1A              | 1.951(7) | Cu1A–N1A                | 1.99(4) | Cu1A–N1A              | 1.87(4) |
| Cu1A–N1A <sup>i</sup> | 1.951(7) | Cu1A–N1A <sup>i</sup>   | 1.99(4) | Cu1A–N1A <sup>i</sup> | 1.87(4) |

Symmetry code: *i*) 1 -x, 1-y, 1-z.

**Table S3.** Geometrical parameters of the intermolecular N–H···O and C–H···O hydrogen bonds in **1**, **2a** and **2h**.

| Donor–H···Acceptor            | D–H  | H···A | D···A     | D–H···A |
|-------------------------------|------|-------|-----------|---------|
| <b>1</b>                      |      |       |           |         |
| N1G–H1GA···O3W <sup>i</sup>   | 0.88 | 1.93  | 2.743(18) | 153     |
| N1G–H1GB···O1W                | 0.88 | 2.03  | 2.889(17) | 167     |
| N2G–H2GA···O910 <sup>ii</sup> | 0.88 | 2.42  | 3.127(11) | 138     |
| N2G–H2GB···O2W <sup>iii</sup> | 0.88 | 2.19  | 3.065(14) | 174     |
| N3G–H3GB···O2T                | 0.88 | 2.48  | 3.278(18) | 152     |
| N4G–H4GA···O910 <sup>iv</sup> | 0.88 | 2.05  | 2.920(9)  | 170     |
| N4G–H4GB···O67                | 0.88 | 2.18  | 3.030(91) | 163     |
| N5G–H5GA···O12 <sup>ii</sup>  | 0.88 | 2.49  | 3.326(9)  | 159     |
| N5G–H5GB···O810 <sup>iv</sup> | 0.88 | 2.16  | 3.030(9)  | 168     |
| N10G–H10B···O712 <sup>v</sup> | 0.88 | 2.24  | 2.926(16) | 135     |
| N10G–H10A···O5W               | 0.88 | 2.14  | 2.85(2)   | 137     |
| N6G–H6GA···O14 <sup>ii</sup>  | 0.88 | 2.17  | 2.953(9)  | 148     |
| N6G–H6GB···O6T                | 0.88 | 2.25  | 3.043(9)  | 150     |
| N7G–H7GA···O9A                | 0.88 | 2.36  | 3.024(10) | 133     |
| N13G–H13A···O4T <sup>ii</sup> | 0.88 | 2.19  | 3.040(10) | 163     |
| N13G–H13B···O37               | 0.88 | 2.29  | 3.096(11) | 151     |
| N14G–H14A···O45 <sup>ii</sup> | 0.88 | 2.05  | 2.912(10) | 167     |
| N14G–H14B···O11T <sup>i</sup> | 0.88 | 2.35  | 3.077(11) | 140     |
| N8G–H8GB···O9A                | 0.88 | 2.08  | 2.820(9)  | 141     |
| N15G–H15A···O2W <sup>ii</sup> | 0.88 | 2.15  | 3.011(14) | 165     |
| N15G–H15B···O3T               | 0.88 | 2.45  | 3.194(11) | 143     |
| N8G–H8GB···O56 <sup>i</sup>   | 0.88 | 2.49  | 3.103(11) | 127     |
| N9G–H9GA···O411 <sup>ii</sup> | 0.88 | 2.04  | 2.906(8)  | 168     |
| N9G–H9GB···O511 <sup>i</sup>  | 0.88 | 2.12  | 2.961(8)  | 160     |
| C3A–H3A···O89 <sup>vi</sup>   | 0.95 | 2.28  | 3.212(11) | 166     |
| C5A–H5A···O612 <sup>i</sup>   | 0.95 | 2.33  | 3.043(11) | 131     |

**Table S3 (continuation).** Geometrical parameters of the intermolecular N–H...O and C–H...O type hydrogen bonds in **1**, **2a** and **2h**.

| <b>2a</b>                        |      |      |          |     |
|----------------------------------|------|------|----------|-----|
| N1G–H1GA...O9A <sup>vii</sup>    | 0.88 | 2.12 | 2.87(3)  | 143 |
| N2G–H2GA...O910 <sup>viii</sup>  | 0.88 | 2.07 | 2.89(3)  | 155 |
| N2G–H2GB...O12T                  | 0.88 | 2.07 | 2.85(3)  | 148 |
| N3G–H3GA...O9A <sup>vii</sup>    | 0.88 | 2.11 | 2.87(3)  | 144 |
| N3G–H3GB...O49 <sup>viii</sup>   | 0.88 | 2.46 | 3.17(3)  | 138 |
| N4G–H4GA...O67 <sup>ix</sup>     | 0.88 | 2.12 | 2.95(3)  | 159 |
| N4G–H4GB...O89 <sup>x</sup>      | 0.88 | 2.08 | 2.95(3)  | 168 |
| N5G–H5GA...O8T <sup>x</sup>      | 0.88 | 1.88 | 2.75(3)  | 172 |
| N5G–H5GB...O2T                   | 0.88 | 2.31 | 3.11(4)  | 151 |
| N5G–H5GB...O25                   | 0.88 | 2.25 | 2.93(3)  | 134 |
| N10G–H10A...O78                  | 0.88 | 2.33 | 3.07(3)  | 142 |
| N6G–H6GA...O6T <sup>ix</sup>     | 0.88 | 1.93 | 2.80(3)  | 171 |
| N11G–H11A...O6T <sup>xi</sup>    | 0.87 | 2.51 | 3.13(4)  | 129 |
| N11G–H11B...O1T <sup>vii</sup>   | 0.88 | 2.26 | 3.05(4)  | 149 |
| N6G–H6GB...O14                   | 0.89 | 2.58 | 3.27(3)  | 135 |
| N12G–H12A...O810                 | 0.88 | 2.15 | 3.01(4)  | 168 |
| N12G–H12B...O5T <sup>xi</sup>    | 0.88 | 2.21 | 2.96(4)  | 144 |
| N7G–H7GA...O9A <sup>xii</sup>    | 0.88 | 1.97 | 2.81(3)  | 159 |
| N13G–H13B...O45 <sup>xii</sup>   | 0.88 | 2.05 | 2.91(3)  | 165 |
| N7G–H7GB...O411 <sup>xiii</sup>  | 0.88 | 1.96 | 2.80(3)  | 161 |
| N14G–H14A...O10T <sup>vii</sup>  | 0.88 | 2.29 | 3.09(3)  | 152 |
| N14G–H14B...O5T <sup>xii</sup>   | 0.88 | 2.03 | 2.90(3)  | 171 |
| N8G–H8GA...O8A <sup>xii</sup>    | 0.87 | 2.36 | 3.20(4)  | 161 |
| N15G–H15A...O23                  | 0.88 | 2.19 | 2.98(4)  | 150 |
| N15G–H15B...O12T <sup>i</sup>    | 0.88 | 2.18 | 2.91(4)  | 139 |
| N8G–H8GB...O612                  | 0.88 | 2.13 | 2.95(4)  | 154 |
| <b>2h</b>                        |      |      |          |     |
| N1G–H1GA...O9 <sup>xiv</sup>     | 0.88 | 1.99 | 2.78(5)  | 149 |
| N1G–H1GB...O1W <sup>xiv</sup>    | 0.88 | 1.91 | 2.70(6)  | 150 |
| N2–H2A...O45 <sup>xii</sup>      | 0.88 | 2.05 | 2.92(4)  | 172 |
| N2G–H2GA...O12T <sup>viii</sup>  | 0.87 | 2.22 | 2.98(5)  | 147 |
| N3–H3A...O10T <sup>vii</sup>     | 0.87 | 2.27 | 3.11(3)  | 161 |
| N3–H3B...O5T <sup>xii</sup>      | 0.88 | 2.21 | 2.97(4)  | 160 |
| N2G–H2GB...O910                  | 0.88 | 2.12 | 2.94(4)  | 154 |
| N3G–H3GA...O9 <sup>xiv</sup>     | 0.88 | 2.35 | 3.04(5)  | 136 |
| N3G–H3GB...O49                   | 0.88 | 2.32 | 3.06(4)  | 141 |
| N4G–H4GA...O89 <sup>xv</sup>     | 0.88 | 2.08 | 2.94(3)  | 169 |
| N4G–H4GB...O67 <sup>ix</sup>     | 0.88 | 2.14 | 2.98(3)  | 160 |
| N5G–H5GA...O2T                   | 0.88 | 2.47 | 3.25(5)  | 150 |
| N5G–H5GA...O25                   | 0.88 | 2.25 | 2.95(4)  | 137 |
| N5G–H5GB...O8T <sup>xv</sup>     | 0.88 | 1.89 | 2.77(4)  | 172 |
| N10G–H10A...O8T <sup>xv</sup>    | 0.87 | 2.36 | 3.05(10) | 136 |
| N10G–H10B...O4T <sup>xii</sup>   | 0.89 | 2.50 | 3.23(9)  | 139 |
| N6G–H6GA...O14                   | 0.88 | 2.59 | 3.26(4)  | 134 |
| N11G–H11A...O11T <sup>xiii</sup> | 0.87 | 2.12 | 2.98(8)  | 170 |
| N6G–H6GB...O6T <sup>ix</sup>     | 0.88 | 2.01 | 2.87(4)  | 168 |
| N7G–H7GA...O411 <sup>xiii</sup>  | 0.88 | 2.01 | 2.84(4)  | 156 |
| N13G–H13A...O4T <sup>xii</sup>   | 0.88 | 2.31 | 3.11(8)  | 151 |
| N7G–H7GA...O9 <sup>xii</sup>     | 0.88 | 1.99 | 2.83(4)  | 160 |
| N14G–H14B...O6T                  | 0.87 | 2.38 | 3.13(8)  | 145 |
| N8G–H8GA...O612                  | 0.88 | 2.15 | 3.00(5)  | 163 |
| N15G–H15A...O12T <sup>i</sup>    | 0.88 | 2.36 | 3.01(5)  | 132 |
| N15G–H15B...O23                  | 0.88 | 2.33 | 3.08(4)  | 143 |
| N8G–H8GB...O8 <sup>xii</sup>     | 0.87 | 2.34 | 3.20(5)  | 167 |

Symmetry codes: i)  $x, \frac{1}{2}-y, \frac{1}{2}+z$ ; ii)  $1-x, -\frac{1}{2}+y, \frac{1}{2}-z$ ; iii)  $-x, -1/2+y, \frac{1}{2}-z$ ; iv)  $2-x, -1/2+y, \frac{1}{2}-z$ ; v)  $-1+x, y, z$ ; vi)  $2-x, 1-y, 1-z$ ; vii)  $1-x, \frac{1}{2}+y, \frac{1}{2}-z$ ; viii)  $1-x, -y, -z$ ; ix)  $-x, -1/2+y, \frac{1}{2}-z$ ; x)  $-1+x, y, z$ ; xi)  $1+x, y, z$ ; xii)  $-x, \frac{1}{2}+y, \frac{1}{2}-z$ ; xiii)  $-x, -y, -z$ ; xiv)  $x, -1/2-y, -1/2+z$ ; xv)  $1+x, y, z$ .

**Table S4** Distances (Å) from the O atoms of W1-W2-W3 trimers to picolinate ring centroids in **2a** and **2h** ( $C_{g_{pic}}$  = N1A, C2A, C3A, C4A, C5A, C6A).

|                      | <b>2a</b> | <b>2h</b> |
|----------------------|-----------|-----------|
| O1T... $C_{g_{pic}}$ | 3.70(2)   | 3.63(3)   |
| O2T... $C_{g_{pic}}$ | 4.97(2)   | 5.16(3)   |
| O3T... $C_{g_{pic}}$ | 4.13(3)   | 4.17(2)   |
| O12... $C_{g_{pic}}$ | 3.79(2)   | 3.87(2)   |
| O13... $C_{g_{pic}}$ | 3.23(2)   | 3.26(2)   |
| O23... $C_{g_{pic}}$ | 3.98(2)   | 4.13(2)   |

**Table S5.** Distances (Å) from the O atoms of W1-W2-W3 trimers to picolinate ring planes (N1A, C2A, C3A, C4A, C5A, C6A) in **2a** and **2h**

|             | <b>2a</b> | <b>2h</b> |
|-------------|-----------|-----------|
| O1T...plane | 2.724     | 2.864     |
| O2T...plane | 2.676     | 2.728     |
| O3T...plane | 2.613     | 2.475     |
| O12...plane | 3.212     | 3.357     |
| O13...plane | 3.159     | 3.170     |
| O23...plane | 3.109     | 3.100     |
